## **Heterozygous gene truncation delineates the human haploinsufficient genome**

István Bartha<sup>1,2†</sup>, Antonio Rausell<sup>1,3†</sup>, Paul J McLaren<sup>1,2</sup>, Pejman Mohammadi<sup>1,4</sup>, Manuel Tardaguila<sup>1</sup>, Nimisha Chaturvedi<sup>1,2</sup>, Jacques Fellay<sup>1,2</sup>, Amalio Telenti<sup>5\*</sup>

<sup>1</sup>SIB Swiss Institute of Bioinformatics, Lausanne and Basel, Switzerland

<sup>2</sup>School of Life Sciences, École Polytechnique Fédérale de Lausanne, Lausanne, Switzerland

<sup>3</sup>Vital-IT group, SIB Swiss Institute of Bioinformatics, Lausanne, Switzerland

<sup>4</sup>Computational Biology Group, ETH Zurich, Switzerland

<sup>5</sup>J. Craig Venter Institute, La Jolla, CA, US

\*Correspondence to: [atelenti@jcvj.org](mailto:atelenti@jcvj.org)

†Equal contribution

Sequencing projects have identified large numbers of rare stop-gain and frameshift variants in the human genome. As most of these are observed in the heterozygous state, they test a gene's tolerance to haploinsufficiency and dominant loss of function. We analyzed the distribution of truncating variants across 16,260 protein coding autosomal genes in 11,546 individuals. We observed 39,893 truncating variants affecting 12,062 genes, which significantly differed from an expectation of 12,916 genes under a model of neutral *de novo* mutation ( $p < 10^{-4}$ ). Extrapolating this to increasing numbers of sequenced individuals, we estimate that 10.8% of human genes do not tolerate heterozygous truncating variants. An additional 10 to 15% of truncated genes may be rescued by incomplete penetrance or compensatory mutations, or because the truncating variants are of limited functional impact. The study of protein truncating variants delineates the essential genome and, more generally, identifies rare heterozygous variants as an unexplored source of diversity of phenotypic traits and diseases

Recent population expansion and limited purifying selection have led to an abundance of rare human genetic variation<sup>1-3</sup> including stop-gain and frameshift mutations. Thus, there is increasing interest in the identification of natural human knockouts<sup>3-8</sup> through the cataloging of homozygous truncations. However, heterozygous truncation can also lead to deleterious functional consequences through haploinsufficiency due to decreased gene dosage, or through a dominant-negative effect<sup>9,10</sup>. In order to quantify the importance of heterozygous protein truncating variation, we characterized genes showing fewer *de novo* truncations in the general population than expected under a neutral model. We hypothesized that there is a set of genes that cannot tolerate heterozygous protein truncating variants (PTVs) because of early life lethality.

## Results

### Fewer genes carry heterozygous PTVs than expected under neutral evolution

We used stop-gain (nonsense) single nucleotide variants and frameshift (insertions/deletions) variants to assess tolerance to heterozygous PTVs across the human genome. We considered transcripts from 16,260 autosomal protein coding genes annotated by the consensus coding sequence (CCDS) project<sup>11</sup>, for which *de novo* mutation rate estimates were recently calculated<sup>12</sup>, and where the number of synonymous variants in sequenced individuals followed expectation (**Online Methods**). The study dataset included 11,546 exomes in which we observed 39,893 rare PTVs (allele frequency < 1%), affecting 12,062 (74.1%) genes.

To test whether there is a subset of genes that are intolerant to heterozygous truncation, we simulated a model of generation of neutral *de novo* PTVs for all genes (i.e. assuming viability of affected individuals). By randomly assigning 39,893 hypothetical stop-gain and frameshift variants to genes according to their *de novo* mutation rate<sup>12</sup>, we observed that 12,916 out of 16,260 genes (95% CI, 12,805-12,991) would be expected to carry at least one stop-gain or frameshift variant. The expected number of genes is significantly greater than the 12,062 truncated genes observed in the study dataset for the same number of PTVs (6.6% depletion, empirical p-value <  $1 \times 10^{-4}$ ; **Figure 1A**). The depletion in number of observed truncated genes was greater when severe PTVs, i.e. those predicted to have the greatest functional impact<sup>13</sup>, were considered (n=10,340 vs. a neutral expectation of 11,821-11,978; 13.1% depletion p <

$1 \times 10^{-4}$ ). This suggests that a measurable fraction of *de novo* heterozygous stop-gain and frameshift variants are highly deleterious and hence under strong purifying selection. Hereafter we denote that fraction as the haploinsufficient genome ( $f_{hi}$ ).

### Characteristics of genes comprising the haploinsufficient genome

We assessed the functional properties of the subset of genes that were not observed to carry PTVs ( $n=4,198$ ), **Table 1**. These genes were highly conserved, had fewer paralogs, were more likely to be part of protein complexes and were more connected in protein-protein interaction networks than the rest of the genes. Furthermore, they had characteristics of essentiality and haploinsufficiency, and a higher probability of CRISPR-Cas9 editing compromising cell viability. The set of genes not carrying PTVs was enriched in OMIM genes annotated with ‘haploinsufficient’ or ‘dominant negative’ keywords. Non truncated genes were overrepresented in functional categories such as transcription regulation, developmental processes, cell cycle, and nucleic acid metabolism (**Supplementary Table 1**), in line with earlier characterization of haploinsufficient genes<sup>14</sup>. Together, these results indicate that a number of basic cellular functions depend on the integrity of coding and expression of both alleles of component genes.

### Estimating the fraction of genes intolerant to heterozygous stop-gain and frameshift variants.

Genes without PTVs in our analysis may be truly part of the haploinsufficient genome or the result of insufficient sample size to detect rare events. Thus, we next sought to estimate the total haploinsufficient fraction ( $f_{hi}$ ) of the genome in the full population by a modeling approach. Assuming that a fraction  $f_{hi}$  of genes do not carry *de novo* PTVs while the remaining genes do so according to their neutral mutation rates<sup>12</sup>,  $f_{hi}$  can be estimated by fitting a model to the observed relative distribution of PTVs (relative to the rest of genes; **Online Methods**). This analysis estimates a fraction of the haploinsufficient genome of  $f_{hi}=10.8\%$  (95% CI=9.5-11.7%) of protein coding genes (**Figure 1A**).

Some genes may tolerate PTVs because their functional effects are masked by incomplete penetrance<sup>15</sup>, by compensatory variants<sup>16</sup>, or because of a low functional impact of the truncation<sup>13</sup>. In addition, false positive errors in sequencing and variant calling procedures contribute to the distribution of observed variants<sup>17-19</sup>. We collectively treated these factors as noise, because they can lead to the observation of a truncated gene in a viable individual without

truly probing the general viability of carrying only one functional allele in a given gene. Therefore, we extended our model to allow for the possibility of observing PTVs in the haploinsufficient fraction of the genome by introducing a second parameter representing the number of variants originating from biological noise (incomplete penetrance, compensatory variants and low impact truncation) or technical noise (sequencing or variant calling errors) in genes otherwise intolerant to truncation (**Online Methods**). Using these parameters, the estimated fraction of genes intolerant to PTVs increased to 24.4% (95% CI, 18.3-32.1%, **Figure 1B**).

An important consequence of biological and technical noise is that the apparently truncated fraction of genes does not saturate as a function of the number of observed PTVs, but keeps rising. Our model predicts that after having sequenced 40,000 exomes (representing a sample of approximately 90,000 PTVs) more than 50% of newly identified truncated genes will result from biological and technical noise (**Supplementary Figure 1**) - an important consideration for ongoing sequencing programs and interpretation of resources, such as that of the Exome Aggregation Consortium (ExAC, <http://exac.broadinstitute.org>). At the sample size of 40,000 exomes, and with 2 to 6% of all observed truncations due to technical errors<sup>5,6,8</sup>, 400 to 1025 genes intolerant to PTVs will exhibit truncations due to sequencing and variant calling errors. For the same sample size, 2345 to 2549 genes intolerant to PTVs will exhibit truncations due to incomplete penetrance, compensatory variants or low impact truncation.

We next assessed the robustness of these estimates using an alternative approach that models the expected number of PTVs as a function of the observed synonymous coding variants (**Online Methods**). This model assumes that, in the absence of deleterious consequences, the number of heterozygous PTVs correlates with the number of synonymous variants observed in a gene. This approach resulted in highly similar estimates of  $f_{hi}$  (95% CI 19.7-34.1%) compared to the previous model. Leveraging the latter model, we identified 278 genes (**Supplementary Table 2**) that have higher than 0.99 posterior probability of being intolerant to heterozygous truncation (**Figure 2**). However, there is a continuum of tolerance to heterozygous truncation as depicted in **Figure 2**, with a large number of genes harboring fewer heterozygous PTVs than expected.

## Discussion

This work suggests that heterozygous protein truncating variants have greater functional consequences than generally considered. This concept is supported by the identification of a substantial proportion of genes that do not tolerate loss of one of the two gene copies, and by the evidence for a gradient of haploinsufficiency across a large proportion of the coding genome. Heterozygous PTVs are rarely compensated at the gene expression level, as shown in our previous work<sup>13</sup> and in recent analyses<sup>7</sup>. Despite the absence of dosage compensation, Rivas et al. suggest that homeostatic mechanisms at the cellular level maintain biological function<sup>7</sup>. However, we show clear evidence that over 10% of the genes cannot be compensated, while an additional 10 to 15% of truncated genes may be rescued by incomplete penetrance or compensatory mutations, or because the truncating variants are of limited functional impact.

The importance of these variants has also been observed in model organisms. Studies in mice show that when homozygous knockout mutants are not viable, up to 71.7% of heterozygous PTVs have phenotypic consequences<sup>20</sup>. The systematic phenotyping of knockout mice also demonstrates that haploinsufficiency might be more common than generally suspected<sup>21</sup>. However, a practical limitation of the above approaches, in particular in animal studies, is that observation of phenotypes resulting from damaging mutations may require exposure to specific triggers or environmental interactions<sup>6,21</sup>. In contrast, in humans, life-long exposures may eventually reveal a phenotypic trait or disease associated with heterozygous gene truncations<sup>8</sup>. Here, clinical symptoms could be observed later in life, and present sporadically – not necessarily within a pedigree. This is illustrated by a recent report on the consequences of haploinsufficiency of cytotoxic T-lymphocyte-associated protein 4 gene (*CTLA-4*) presenting as undiagnosed or misdiagnosed sporadic autoimmune disorder in the second to fifth decades of life<sup>22</sup>. Despite the prevalence of rare heterozygous PTVs, there has been more attention to the occurrence of homozygous truncations (human knockouts). We argue that homozygous truncations result from high allele frequency variants that are less likely to carry functional consequences (the exception being recessive disorders in a population).

There are a number of possible limitations to the present study. In the modeling work, we analyzed rare variants (less than <1% allele frequency) to focus on *de novo* events and for consistency with the *de novo* mutation rates estimated by Samocha et al.<sup>12</sup>. Nevertheless our

estimates held true when the analysis was restricted to singleton variants, or when we analyzed all variants irrespective of allele frequency (**Supplementary Figure 2**). We did not have primary control on sequencing coverage for some of the exome sequence datasets that could result in ascertainment errors. To correct for this potential bias, we discarded genes where the observed number of synonymous mutations deviated from expectation. The intolerance of genes to *de novo* truncation was assessed across combined human populations. Therefore, estimations of the haploinsufficient genome account for the fraction of haploinsufficient genes common to all humans. Intolerance to heterozygous PTVs should be regarded as a different concept than gene sequence conservation. PTVs in a conserved gene might have a recessive mode of inheritance and are thus potentially observable in a viable individual. On the other extreme, positively selected genes could be haploinsufficient upon heterozygous truncation. These considerations notwithstanding, we consistently identified a quantifiable fraction of the human genome that is intolerant to heterozygous PTVs, with an estimated lower bound of 9.5%.

The prevalent nature of rare heterozygous PTVs suggests that a map of “essentiality” on the basis of dominant loss of function is within reach. The concept of the essential genome has been explored in analyses of minimal bacterial genomes<sup>23</sup>, mouse knockout studies<sup>24</sup>, studies of transposon or chemical mutagenesis<sup>25</sup>, and in studies that used CRISPR-Cas9 genome-editing technology<sup>26,27</sup>. Here, we propose that mapping the haploinsufficient genome will improve the understanding of the genetic architecture of diseases. In agreement with the recent work of Li et al.,<sup>6</sup> we argue that the burden of rare human heterozygous variation is an unexplored source of diversity of phenotypic traits and diseases.

## Materials and methods

**Exomes.** We collected exome data from public and non-public sources (**Supplementary Table 3**). We considered these individuals as representing the general population. Variants were filtered based on Hardy-Weinberg equilibrium (discarded if  $p < 1 \times 10^{-8}$ ). For public data sets, variants were called at the data source with their respective pipelines. For non-public data sets, sequence reads were aligned using BWA, and called with Haplotypecaller using GATK 3.1. Variants were annotated with SnpEff 3.1 and filtered as described in<sup>28-30</sup>. Only transcripts from autosomal protein coding genes reliably annotated by the Consensus Coding Sequence (CCDS, Release 12

04/40/2013) project<sup>11</sup> that underwent the full process of CCDS curation ('Public' status in CCDS terminology, n=17,756) were considered. As a reference background throughout all analyses, a total number of 16,521 autosomal protein coding genes was obtained by considering genes with available *de novo* mutation rate from Samocha et al.<sup>12</sup> and with at least one synonymous, missense, stop-gain or frameshift variant detected in the exome data. We discarded genes where the observed number of synonymous mutations deviated from expectation (see below). For consistency with<sup>12</sup>, we only retained variants mapping within the limits of the reference transcript used to assess the *de novo* mutation rate per gene. Furthermore, only rare stop-gain and frameshift variants (allele frequency <1%) were considered to assess the deviation from neutral expectations. Throughout the study we considered each rare variant as a single *de novo* event of mutation, irrespective of the number of individuals in which it was observed.

**Models of haploinsufficiency and noise.** Under a neutral model, the expected number of *de novo* PTVs (stop-gain or frameshift) in a gene is determined by its probability of *de novo* mutation (assessed from the sequence context and gene length)<sup>12</sup> and the number of sequenced individuals. However, potential intolerance to heterozygous truncation would decrease the expected number of *de novo* PTVs as a consequence of embryonic or early life lethality. To model the expected number of variants in a gene accounting for potential deleterious effects, we used two approaches.

First we evaluated the relative distribution of PTVs across genes (hereafter the model A). This model assumes that genes tolerating heterozygous truncation will be found truncated in the population according to their relative probability of *de novo* mutation (relative to the rest of genes), while a fraction of genes will not be observed as truncated due to early lethality. Based on the relative distribution of observed PTVs, this approach avoids issues of systematic false negative errors, though is still subject to false positive calls. Alternatively, we assessed a second model (hereafter the model B) in which the absolute number of *de novo* PTVs in a gene is estimated from the probability of *de novo* PTVs and the absolute number of observed *de novo* synonymous coding variants in that gene.

Model A is formulated as follows. In a neutral case we expect that the relative fraction of variants in a given gene is equal to  $\frac{p_g^{trunc}}{\sum p_i^{trunc}}$ , i.e. the relative distribution of observed variants



follows the distribution of *de novo* mutation rates. As some genes might harbor fewer or more mutations than the expectation, the relative model's expected variant count for a gene  $g$  is defined as:

$$E_g^{trunc} = V \alpha_g t_g,$$

where  $V$  stands for the total number of observed truncating variants summed over all genes,  $\alpha_g = p_g^{trunc} / \sum p_i^{trunc}$ , and  $t_g$  accounts for the gene specific deviances from the neutral case. Assuming two classes of genes (named HI for haploinsufficient and HS for non-haploinsufficient) with a class-specific  $t_i$  we get the following expectations for a gene  $g$ :

$$E_{HS}^{trunc} = V \alpha_g t + V \alpha_g \frac{1-t}{1-f_{hi}},$$

$$E_{HI}^{trunc} = V \alpha_g t,$$

where  $f_{hi}$  is the fraction of the total number of genes that belongs to the HI class. This model distributes a fixed number of variants to all genes according to their *de novo* variation rates modulated by haploinsufficiency and the penetrance of haploinsufficient genes, and is equivalent to taking  $V$  samples from a multinomial distribution with  $\alpha$  weights.

To formulate model B, we assume that the expected number of *de novo* synonymous mutations is

$$E_g^{syn} = M p_g^{syn},$$

where  $p_g^{syn}$  is the *de novo* rate of synonymous mutations in a gene  $g$  and  $M$  is a constant. Following <sup>12</sup> we estimate  $M$  from the regression of the observed number of synonymous mutations ( $O_g^{syn}$ ) in a gene on  $p_g^{syn}$ :

$$O_g^{syn} = M p_g^{syn} + e.$$

To avoid genes with low coverage, we disregarded from the analysis those genes whose residual in the above regression is higher than 3 times the standard deviation of all residuals. We note that, in contrast to <sup>12</sup> we omit the intercept term in this regression, because we expect no variants in a gene for which  $p_g^{syn}$  equals zero.

Having estimated  $M$ , the expected number of PTVs in a gene  $g$  is given by:

$$E_g^{trunc} = M p_g^{trunc}.$$

Introducing gene specific differences in the number of observed PTVs we write:

$$E_g^{trunc} = M p_g^{trunc} s_g,$$

where  $s_g$  accounts for both gene specific differences and systematic errors. We do not estimate  $s_g$  for each gene, but assume that genes can be classified into two groups (haploinsufficient and non-haploinsufficient), each having a distinct class specific value of  $s$ .

To estimate the fraction of genes intolerant to heterozygous PTVs we use the following mixture model. We define a random variable  $x_g$  as the number of variants in gene  $g$ . A latent random variable  $z_g$  can take two values: *HI* or *HS* and has the probability density distribution:

$$P(z_g = HI) := f_{hi}$$

$$P(z_g = HS) := 1 - f_{hi}$$

where the parameter  $f_{hi}$  represents the fraction of genes intolerant to heterozygous PTVs. The conditional probability distribution of  $x_g$  given  $z_g$  is defined as:

$$P(x_g = k | z_g = HI) = \text{Poisson}(k, \lambda_{HI})$$

$$P(x_g = k | z_g = HS) = \text{Poisson}(k, \lambda_{HS})$$

$$\lambda_{HS} = E_{HS}^{trunc}$$

$$\lambda_{HI} = E_{HI}^{trunc}.$$

Marginalizing over the values of the latent variable  $z_g$  yields the probability density distribution of  $x_g$  as:

$$P(x_g = k) = f_{hi} \text{Poisson}(k, \lambda_{HI}) + (1 - f_{hi}) \text{Poisson}(k, \lambda_{HS})$$

The probability that a gene acquiring  $k$  variants is:

$$P(X = k) = \frac{\sum_g P(x_g = k)}{|G|}.$$

The model's three parameters ( $p_{hi}, r, p$ ) are estimated by fitting the cumulative density distribution of  $X$  to the empirical cumulative density distribution of the data by least-squares fitting using the Nelder-Mead simplex numerical optimization algorithm (as implemented in the Apache Commons Math library). This method provided better estimates for reproducing the distribution of variant counts per gene compared to other alternatives considered (**Supplementary Figure 3**). In order to estimate the variability of the inferred model parameters we repeated the parameter estimation on 500 bootstrap replicates. Each bootstrap replicate was generated by resampling of the list of genes with replacement.

Using the estimated parameters we calculate the posterior probability of haploinsufficiency for gene  $g$  as:

$$P(z_g = HI | x_g = o_g) = \frac{P(z_g = HI)P(x_g = o_g | z_g = HI)}{P(x_g = o_g)},$$

where  $o_g$  is the observed number of PTVs in the gene  $g$ .

**Characteristics of haploinsufficient genes.** Gene sets were obtained from the Reactome pathway database version 40 (<http://www.reactome.org/>). dN/dS values were assessed as described in <sup>13</sup>. Degree of connectivity in the protein-protein interaction network was obtained from the OGEE database (<http://ogeedb.embl.de/>). Paralogs were counted using Ensembl Biomart's 'Human Paralog Ensembl Gene ID' attribute. Genes in protein complexes were obtained from Gene Ontology term GO:0043234 (named "protein complex"). Genes affecting cell viability in CRISPR-Cas9 experiments were collected from <sup>26,27</sup>. Severity of protein truncation was assessed by the NutVar score (<http://nutvar.labtelenti.org>) <sup>13</sup>. For the assessment of depletion or enrichment of functional gene sets we used one tailed hypergeometric test. We adjusted the p-values by the Benjamini- Hochberg method to correct for multiple testing. We tested pathways with at least 100 elements only.

**Acknowledgments:** The authors would like to thank the NHLBI GO Exome Sequencing Project and its ongoing studies; The 1000 Genomes Project, the TwinsUK Cohort; The Avon Longitudinal Study of Parents and Children; The Genome of the Netherlands Project; The Swiss HIV Cohort Study and The National Institute of Environmental Health Science Environmental Genome Project. We are also grateful for access to exome sequence data from the CoLaus cohort, which was sequenced as part of a partnership between the Wellcome Trust Sanger Institute, the CoLaus principal investigators and the Quantitative Sciences dept. of GlaxoSmithKline. We acknowledge the helpful comments of Viktor Müller. Part of the computations were performed at the Vital-IT (<http://www.vital-it.ch>) Center for high-performance computing of the SIB Swiss Institute of Bioinformatics.

## References and Notes:

1. Tennessen, J.A. *et al.* Evolution and functional impact of rare coding variation from deep sequencing of human exomes. *Science* **337**, 64-9 (2012).
2. Nelson, M.R. *et al.* An abundance of rare functional variants in 202 drug target genes sequenced in 14,002 people. *Science* **337**, 100-4 (2012).
3. MacArthur, D.G. *et al.* Guidelines for investigating causality of sequence variants in human disease. *Nature* **508**, 469-76 (2014).
4. MacArthur, D.G. *et al.* A systematic survey of loss-of-function variants in human protein-coding genes. *Science* **335**, 823-8 (2012).
5. Sulem, P. *et al.* Identification of a large set of rare complete human knockouts. *Nat Genet* **47**, 448-52 (2015).
6. Li, A.H. *et al.* Analysis of loss-of-function variants and 20 risk factor phenotypes in 8,554 individuals identifies loci influencing chronic disease. *Nat Genet* (2015).
7. Rivas, M.A. *et al.* Human genomics. Effect of predicted protein-truncating genetic variants on the human transcriptome. *Science* **348**, 666-9 (2015).
8. Lim, E.T. *et al.* Distribution and medical impact of loss-of-function variants in the Finnish founder population. *PLoS Genet* **10**, e1004494 (2014).
9. Fisher, E. & Scambler, P. Human haploinsufficiency--one for sorrow, two for joy. *Nat Genet* **7**, 5-7 (1994).
10. Huang, N., Lee, I., Marcotte, E.M. & Hurler, M.E. Characterising and predicting haploinsufficiency in the human genome. *PLoS Genet* **6**, e1001154 (2010).
11. Pruitt, K.D. *et al.* The consensus coding sequence (CCDS) project: Identifying a common protein-coding gene set for the human and mouse genomes. *Genome Res* **19**, 1316-23 (2009).
12. Samocha, K.E. *et al.* A framework for the interpretation of de novo mutation in human disease. *Nat Genet* **46**, 944-50 (2014).
13. Rausell, A. *et al.* Analysis of stop-gain and frameshift variants in human innate immunity genes. *PLoS Comput Biol* **10**, e1003757 (2014).
14. Dang, V.T., Kassahn, K.S., Marcos, A.E. & Ragan, M.A. Identification of human haploinsufficient genes and their genomic proximity to segmental duplications. *Eur J Hum Genet* **16**, 1350-7 (2008).
15. Rieux-Laucat, F. & Casanova, J.L. Immunology. Autoimmunity by haploinsufficiency. *Science* **345**, 1560-1 (2014).
16. Szamecz, B. *et al.* The genomic landscape of compensatory evolution. *PLoS Biol* **12**, e1001935 (2014).
17. Wall, J.D. *et al.* Estimating genotype error rates from high-coverage next-generation sequence data. *Genome Res* **24**, 1734-9 (2014).
18. Fang, H. *et al.* Reducing INDEL calling errors in whole genome and exome sequencing data. *Genome Med* **6**, 89 (2014).
19. Weisenfeld, N.I. *et al.* Comprehensive variation discovery in single human genomes. *Nat Genet* **46**, 1350-5 (2014).
20. Ayadi, A. *et al.* Mouse large-scale phenotyping initiatives: overview of the European Mouse Disease Clinic (EUMODIC) and of the Wellcome Trust Sanger Institute Mouse Genetics Project. *Mamm Genome* **23**, 600-10 (2012).
21. White, J.K. *et al.* Genome-wide generation and systematic phenotyping of knockout mice reveals new roles for many genes. *Cell* **154**, 452-64 (2013).
22. Kuehn, H.S. *et al.* Immune dysregulation in human subjects with heterozygous germline mutations in CTLA4. *Science* **345**, 1623-7 (2014).
23. Hutchison, C.A. *et al.* Global transposon mutagenesis and a minimal Mycoplasma genome. *Science* **286**, 2165-9 (1999).
24. Bradley, A. *et al.* The mammalian gene function resource: the International Knockout Mouse Consortium. *Mamm Genome* **23**, 580-6 (2012).
25. Venken, K.J. & Bellen, H.J. Chemical mutagens, transposons, and transgenes to interrogate gene function in *Drosophila melanogaster*. *Methods* **68**, 15-28 (2014).

26. Shalem, O. *et al.* Genome-scale CRISPR-Cas9 knockout screening in human cells. *Science* **343**, 84-7 (2014).
27. Wang, T., Wei, J.J., Sabatini, D.M. & Lander, E.S. Genetic screens in human cells using the CRISPR-Cas9 system. *Science* **343**, 80-4 (2014).
28. McKenna, A. *et al.* The Genome Analysis Toolkit: a MapReduce framework for analyzing next-generation DNA sequencing data. *Genome Res* **20**, 1297-303 (2010).
29. Li, H. & Durbin, R. Fast and accurate long-read alignment with Burrows-Wheeler transform. *Bioinformatics* **26**, 589-95 (2010).
30. Reumers, J. *et al.* SNPeffect: a database mapping molecular phenotypic effects of human non-synonymous coding SNPs. *Nucleic Acids Res* **33**, D527-32 (2005).
31. Gravel, S. *et al.* Demographic history and rare allele sharing among human populations. *Proc Natl Acad Sci U S A* **108**, 11983-8 (2011).
32. Petrovski, S., Wang, Q., Heinzen, E.L., Allen, A.S. & Goldstein, D.B. Genic intolerance to functional variation and the interpretation of personal genomes. *PLoS Genet* **9**, e1003709 (2013).

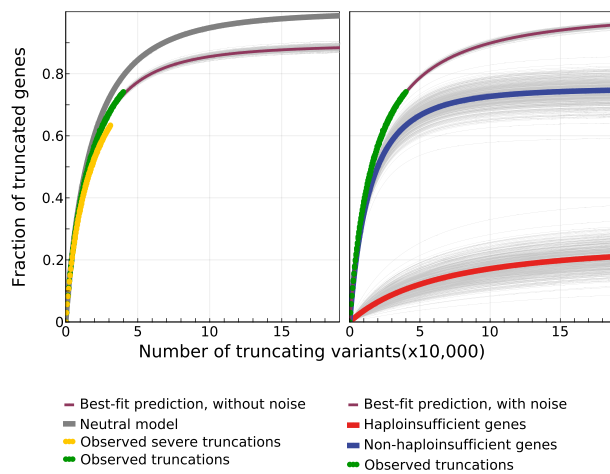

**Figure 1. Observed and expected PTVs in the study population.** **A:** Fraction of genes with at least one stop-gain or frameshift variant as a function of the number of sampled PTVs. The gray curve shows the expected number of genes under a model of neutral de novo mutation rate 12 representing the null hypothesis (no deleterious effects). The green curve shows the number of genes observed with at least one PTV. The orange curve limits the number of observed genes to those hosting highly damaging variants 13. The purple curve shows the predicted number of genes with at least one PTV under the estimated best-fit parameters under model A (see Online Methods). **B:** Extrapolation of the observed number of genes with at least one PTV assuming a model that includes the possibility of finding PTVs due to biological and technical noise. The purple curve shows the predicted number of genes with at least one PTV under the estimated best-fit parameters, while the green curve shows the observed data. Decomposition of the observed and predicted number of genes with at least one PTV: variants in non-haploinsufficient genes (blue) saturate early; variants found in haploinsufficient genes (red) continue to accumulate PTVs due to the constant contribution of biological and technical noise.

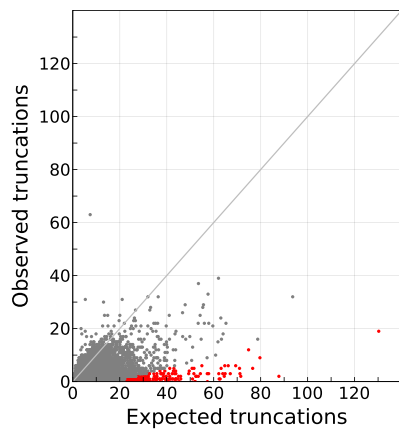

**Figure 2. Expected and observed number of PTVs per gene.** Each dot in the scatter plot corresponds to a gene. X-axis reflects the expected number of PTVs for each gene according to a model of neutral variation based on synonymous variants (Model B, see Online Methods) while on Y-axis indicates observed number of PTVs in the study dataset. Genes intolerant to heterozygous PTVs with a posterior probability of  $\geq 0.99$  are colored in red. The distribution shows that there is a continuum of intolerance to PTVs with a general paucity of observed versus expected truncations in the coding genome. The gray line has a slope of 1.



**Table 1. Characteristics of the subset of genes (n=4,204) observed without PTVs after sequencing 16,260 protein coding autosomal genes in 11,546 individuals.** Tests compare genes with and without heterozygous PTVs.

| Annotation                                              | Effect in non-truncated genes | P-value | Test                | Data Source                                                          |
|---------------------------------------------------------|-------------------------------|---------|---------------------|----------------------------------------------------------------------|
| dN/dS                                                   | Lower (conservation)          | 1E-295  | Rank-sum test       | Ensembl primate genomes <sup>13</sup>                                |
| Paralog count                                           | Lower                         | 4E-94   | Poisson regression  | Ensembl Biomart                                                      |
| Loss of cell viability (CRISPR-Cas9)                    | Enrichment                    | 3E-16   | Logistic regression | Shalem et al. 2014 <sup>26</sup>                                     |
| Part of a protein complex                               | Enrichment                    | 3E-29   | Logistic regression | Gene Ontology term “Protein complex” GO:0043234                      |
| Essentiality                                            | Higher                        | 4E-34   | Logistic regression | OGEE ( <a href="http://ogeedb.embl.de/">http://ogeedb.embl.de/</a> ) |
| Connectivity in protein-protein interaction network     | Higher                        | 5E-52   | Linear regression   | OGEE ( <a href="http://ogeedb.embl.de/">http://ogeedb.embl.de/</a> ) |
| Predicted haploinsufficiency                            | Higher                        | 1E-162  | Linear regression   | Huang et al. 2010 <sup>10</sup>                                      |
| OMIM ‘haploinsufficient’ and ‘dominant negative’ subset | Enrichment                    | 5E-12   | Logistic regression | Petrovski et al. 2013 <sup>32</sup>                                  |

## Supplementary materials

Table S1: **Enrichment tests results against Reactome pathways for genes without PTVs.** Only significant results are shown as judged by 5% FDR calculated using the Benjamini-Hochberg procedure.

Table S2: **Genes with higher than 0.99 posterior probability of being intolerant to heterozygous PTVs.**

Table S3: **Data sources.**

Figure S1: **Conditional probability that when observing a gene truncated for the first time, the gene is intolerant to PTVs.** When the conditional probability crosses 50% (at 90,000 PTVs) biological and technical noise become the main source of truncations. We estimate that 40,000 exomes are required to sample 90,000 PTVs using the jackknife projection as in<sup>31</sup>.

Figure S2: **Distribution of parameter estimates and predictions of the model A.** Analysis considers only singletons (A-C), all variants irrespective of allele frequency (D-F) or rare variants (G-I).

Figure S3: **Distribution of variant counts per gene as observed or predicted under best-fit parameters of model A using 3 different estimation techniques.** A: linear space, B: log space. Black curve: observed counts, red curve: prediction based on least-squares fit to the cumulative distribution function (see Online Methods), green curve: maximum likelihood estimate, blue curve: least squares fit to the accumulation curve of truncated genes as shown in Figure 1. The CDF method was chosen and maximum likelihood was discarded because its estimates did not fit the observations.

**Table S1:** Enrichment tests results against Reactome pathways for genes without PTVs. Only significant results are shown as judged by 5% FDR calculated using the Benjamini-Hochberg procedure.

| Effect direction | name                                                                                   | uncorrected p-# of genes in pathway in | ba# of genes in pathway without any truncation |     |
|------------------|----------------------------------------------------------------------------------------|----------------------------------------|------------------------------------------------|-----|
| Enrichment       | Metabolism of mRNA                                                                     | 2.54E-33                               | 206                                            | 135 |
| Enrichment       | Disease                                                                                | 3.62E-30                               | 552                                            | 265 |
| Enrichment       | Metabolism of RNA                                                                      | 5.43E-30                               | 252                                            | 150 |
| Enrichment       | Eukaryotic Translation Initiation                                                      | 3.39E-29                               | 103                                            | 81  |
| Enrichment       | Cap-dependent Translation Initiation                                                   | 3.39E-29                               | 103                                            | 81  |
| Enrichment       | Translation                                                                            | 3.05E-28                               | 131                                            | 94  |
| Enrichment       | Influenza Life Cycle                                                                   | 9.84E-18                               | 128                                            | 79  |
| Enrichment       | Influenza Infection                                                                    | 2.87E-17                               | 132                                            | 80  |
| Enrichment       | Mitotic G1-G1S phases                                                                  | 4.86E-16                               | 127                                            | 76  |
| Enrichment       | Metabolism of proteins                                                                 | 5.53E-15                               | 379                                            | 167 |
| Enrichment       | Gene Expression                                                                        | 2.28E-14                               | 856                                            | 319 |
| Enrichment       | Adaptive Immune System                                                                 | 1.14E-12                               | 441                                            | 181 |
| Enrichment       | Immune System                                                                          | 1.28E-11                               | 799                                            | 290 |
| Enrichment       | Antigen processing: Ubiquitination & Proteasome degradation                            | 1.33E-10                               | 199                                            | 93  |
| Enrichment       | G1S Transition                                                                         | 3.73E-10                               | 102                                            | 56  |
| Enrichment       | Processing of Capped Intron-Containing Pre-mRNA                                        | 5.94E-10                               | 129                                            | 66  |
| Enrichment       | Apoptosis                                                                              | 1.32E-09                               | 139                                            | 69  |
| Enrichment       | mRNA Processing                                                                        | 2.39E-09                               | 146                                            | 71  |
| Enrichment       | Developmental Biology                                                                  | 5.10E-09                               | 377                                            | 148 |
| Enrichment       | Signaling by the B Cell Receptor (BCR)                                                 | 5.51E-09                               | 121                                            | 61  |
| Enrichment       | Signalling by NGF                                                                      | 2.90E-08                               | 205                                            | 89  |
| Enrichment       | Cell Cycle, Mitotic                                                                    | 4.04E-08                               | 306                                            | 122 |
| Enrichment       | Class I MHC mediated antigen processing & presentation                                 | 5.28E-08                               | 237                                            | 99  |
| Enrichment       | S Phase                                                                                | 7.71E-08                               | 106                                            | 53  |
| Enrichment       | Cell Cycle                                                                             | 1.71E-07                               | 376                                            | 142 |
| Enrichment       | NGF signalling via TRKA from the plasma membrane                                       | 4.13E-07                               | 130                                            | 60  |
| Enrichment       | Signaling by Insulin receptor                                                          | 8.24E-07                               | 104                                            | 50  |
| Enrichment       | Signaling by Interleukins                                                              | 1.09E-06                               | 102                                            | 49  |
| Enrichment       | Signaling by FGFR                                                                      | 1.27E-06                               | 108                                            | 51  |
| Enrichment       | Signaling by EGFR                                                                      | 5.74E-06                               | 104                                            | 48  |
| Enrichment       | Signaling by EGFR in Cancer                                                            | 1.09E-05                               | 106                                            | 48  |
| Enrichment       | Axon guidance                                                                          | 2.44E-05                               | 231                                            | 88  |
| Enrichment       | Transcription                                                                          | 2.77E-05                               | 163                                            | 66  |
| Enrichment       | Neuronal System                                                                        | 2.78E-05                               | 254                                            | 95  |
| Enrichment       | Integration of energy metabolism                                                       | 2.82E-05                               | 115                                            | 50  |
| Enrichment       | Cytokine Signaling in Immune system                                                    | 3.40E-05                               | 268                                            | 99  |
| Enrichment       | Transmission across Chemical Synapses                                                  | 6.74E-05                               | 167                                            | 66  |
| Enrichment       | DNA Replication                                                                        | 1.06E-04                               | 188                                            | 72  |
| Enrichment       | Cell Cycle Checkpoints                                                                 | 1.07E-04                               | 114                                            | 48  |
| Enrichment       | Platelet activation, signaling and aggregation                                         | 1.28E-04                               | 189                                            | 72  |
| Enrichment       | Hemostasis                                                                             | 2.01E-04                               | 430                                            | 144 |
| Enrichment       | Signaling by PDGF                                                                      | 2.89E-04                               | 115                                            | 47  |
| Enrichment       | Mitotic M-MG1 phases                                                                   | 4.44E-04                               | 167                                            | 63  |
| Enrichment       | Neurotransmitter Receptor Binding And Downstream Transmission In The Postsynaptic Cell | 0.002048899                            | 121                                            | 46  |
| Enrichment       | Membrane Trafficking                                                                   | 0.002048899                            | 121                                            | 46  |
| Enrichment       | Factors involved in megakaryocyte development and platelet production                  | 0.002752386                            | 113                                            | 43  |
| Enrichment       | The citric acid (TCA) cycle and respiratory electron transport                         | 0.002846323                            | 110                                            | 42  |
| Enrichment       | Toll Receptor Cascades                                                                 | 0.004653278                            | 103                                            | 39  |
| Enrichment       | Diabetes pathways                                                                      | 0.005740239                            | 130                                            | 47  |
| Enrichment       | Signal Transduction                                                                    | 0.01955755                             | 1484                                           | 417 |
| Enrichment       | Innate Immune System                                                                   | 0.019603425                            | 238                                            | 76  |
| Depletion        | Olfactory Signaling Pathway                                                            | 5.34E-23                               | 340                                            | 20  |
| Depletion        | GPCR downstream signaling                                                              | 2.03E-07                               | 787                                            | 145 |
| Depletion        | Generic Transcription Pathway                                                          | 2.65E-05                               | 305                                            | 50  |
| Depletion        | Signaling by GPCR                                                                      | 5.91E-05                               | 875                                            | 179 |
| Depletion        | Biological oxidations                                                                  | 2.93E-04                               | 130                                            | 18  |

**Table S2:** Genes with higher than 0.99 posterior probability of being intolerant to heterozygous PTVs.

ACACA  
AHCTF1  
AHNAK  
AKAP6  
ANK1  
ANK2  
ANK3  
ANKHD1  
ANKHD1-EIF4EBP3  
ANKRD11  
ANKRD12  
ANKRD17  
APC  
AQR  
ARFGEF1  
ARHGAP5  
ARHGEF11  
ARHGEF12  
ARHGEF17  
ARID1A  
ARID2  
ARID4B  
ASH1L  
ATAD2B  
ATAD5  
ATG2B  
BAI2  
BAI3  
BAZ1B  
BAZ2A  
BIRC6  
BPTF  
BRWD1  
BSN  
BTAF1  
CACNA1E  
CACNA1I  
CAD  
CAMTA1  
CASC5  
CCDC88A  
CDC42BPB  
CDK12  
CELSR2  
CENPE  
CEP170  
CEP350  
CHD1  
CHD2  
CHD3  
CHD4  
CHD6  
CHD7  
CHD8  
CHD9  
CIT  
CKAP5  
CLTC  
CNOT1  
COL12A1  
COL1A1  
COL4A1  
COL5A2  
CPS1  
CREBBP  
CSMD3  
CTNND2  
DCHS1  
DHX9  
DICER1  
DLG5  
DMXL2  
DNAJC13  
DOCK10  
DOCK2  
DOCK4  
DOCK7  
DSCAM  
DSCAML1  
DSP  
DST  
DYNC1H1  
EHMT1  
EIF3A  
EIF4G1  
ESPL1  
FAM135B  
FAM208B  
FBN1  
FBN2  
FLNC  
FNDC3B  
FRY  
FRYL

GAPVD1  
GCN1L1  
GLI3  
GRIN2B  
GTF3C1  
HEATR1  
HECTD1  
HELZ  
HERC1  
HERC2  
HIVEP1  
HIVEP2  
HMCN1  
HSPG2  
INSR  
ITPR1  
ITSN1  
JMJD1C  
KAT6A  
KAT6B  
KDM2A  
KDM3B  
KDM5A  
KIAA0100  
KIAA0430  
KIAA0922  
KIAA0947  
KIAA1109  
KIAA1549  
KIF13A  
KIF1B  
KIF26B  
LPHN1  
LRP1  
LRP1B  
LRP2  
LRP6  
LYST  
MACF1  
MAP1A  
MAP2  
MAP3K4  
MAST4  
MBDS  
MDN1  
MED12L  
MED13  
MED13L  
MEGF8  
MGA  
MICAL3  
MLL  
MLL2  
MLL5  
MLLT4  
MTOR  
MYH10  
MYO5A  
NAV1  
NAV3  
NBEA  
NCOA1  
NCOA6  
NCOR1  
NEO1  
NF1  
NFAT5  
NIPBL  
NOTCH1  
NOTCH2  
NOTCH3  
NSD1  
NUMA1  
NUP153  
NUP98  
PBRM1  
PCF11  
PCLO  
PDS5A  
PHF3  
PIK3CA  
PIK3R4  
PKD1  
PLCG1  
PLXNA1  
PLXNB2  
PLXNC1  
POGZ  
PPFIA1  
PPRC1  
PRPF4B  
PRRC2A  
PRRC2B  
PRRC2C  
PSME4  
PTPRZ1

RALGAPA1  
RANBP2  
RAPGEF2  
RBBP6  
RBM6  
RELN  
REV3L  
RIMS1  
RLF  
ROCK1  
ROCK2  
RPRD2  
RYSR2  
RYSR3  
SBF2  
SBN01  
SCAF8  
SCN1A  
SETDB1  
SF3B1  
SIN3A  
SLIT2  
SLIT3  
SMARCA4  
SMC3  
SMG1  
SNRNP200  
SOS1  
SPAG9  
SPEG  
SPEN  
SPTA1  
SPTAN1  
SPTB  
SPTBN1  
SRCAP  
STAG1  
SUPT6H  
SVEP1  
SVIL  
SYNE1  
TANC2  
TET1  
THSD7A  
TIAM1  
TJP1  
TLN1  
TMEM131  
TNIK  
TNR  
TNRC18  
TNRC6A  
TOP2B  
TOPBP1  
TP53BP1  
TPR  
TRIO  
TRIP12  
TRRAP  
UBR4  
UBR5  
UPF2  
USP19  
USP24  
USP34  
USP47  
UTP20  
UTRN  
VCAN  
VPS13D  
WDFY3  
WDR33  
WDR7  
WHSC1L1  
YTHDC2  
ZCCHC11  
ZFC3H1  
ZFXH4  
ZNF292  
ZNF318  
ZNF407  
ZNF462  
ZNF521  
ZNF608  
ZNF609  
ZNF638  
ZNF644  
ZZEF1

| Project name                       | Sample size | Reference | URL                                                                                           |
|------------------------------------|-------------|-----------|-----------------------------------------------------------------------------------------------|
| NHLBI Exome Sequencing Project     | 6502        | (34)      | <a href="http://evs.gs.washington.edu/EVS/">http://evs.gs.washington.edu/EVS/</a>             |
| UK10K                              | 2432        | (35)      | <a href="http://www.bristol.ac.uk/alspac/">http://www.bristol.ac.uk/alspac/</a>               |
| 1000 Genomes Project               | 1092        | (36)      | <a href="http://www.1000genomes.org/">http://www.1000genomes.org/</a>                         |
| Genome of the Netherlands          | 498         | (37)      | <a href="http://www.nlgenome.nl">http://www.nlgenome.nl</a>                                   |
| Cohort Lausanne                    | 426         | (38)      | <a href="http://www.colaus.ch/">http://www.colaus.ch/</a>                                     |
| Swiss HIV Cohort Study             | 500         | (39)      | <a href="http://www.shcs.ch/">http://www.shcs.ch/</a>                                         |
| NIEHS Environmental Genome Project | 95          | (40)      | <a href="http://evs.gs.washington.edu/niehsExome">http://evs.gs.washington.edu/niehsExome</a> |
| Genome of J. Craig Venter          | 1           | (41)      | <a href="http://huref.jcvi.org/">http://huref.jcvi.org/</a>                                   |
| Total                              | 11546       |           |                                                                                               |

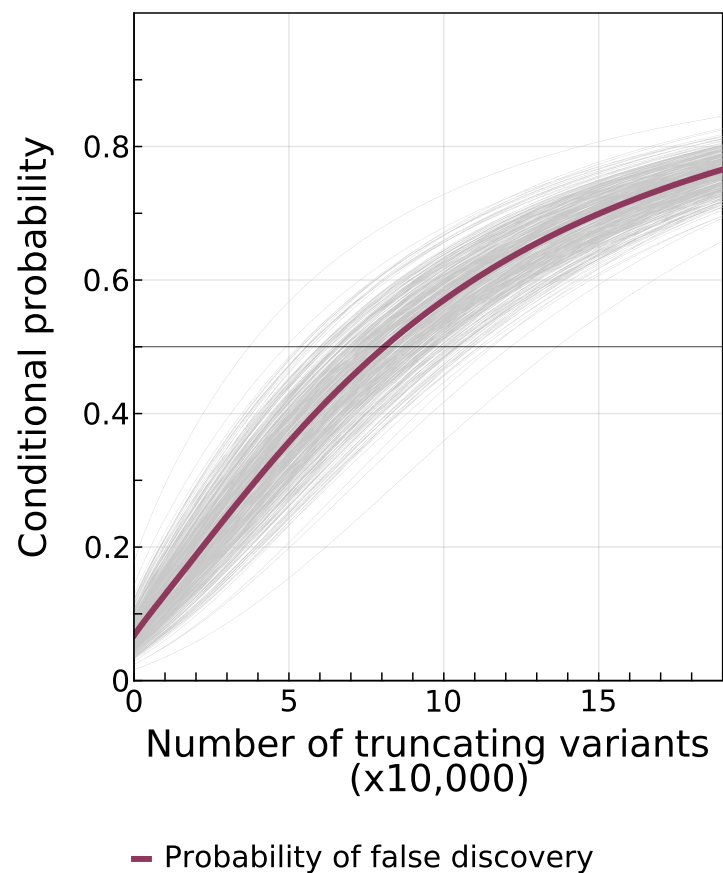

Figure S1: **Conditional probability that when observing a gene truncated for the first time, the gene is intolerant to PTVs.** When the conditional probability crosses 50% (at 90,000 PTVs) biological and technical noise become the main source of truncations. We estimate that 40,000 exomes are required to sample 90,000 PTVs using the jackknife projection as in<sup>32</sup>.



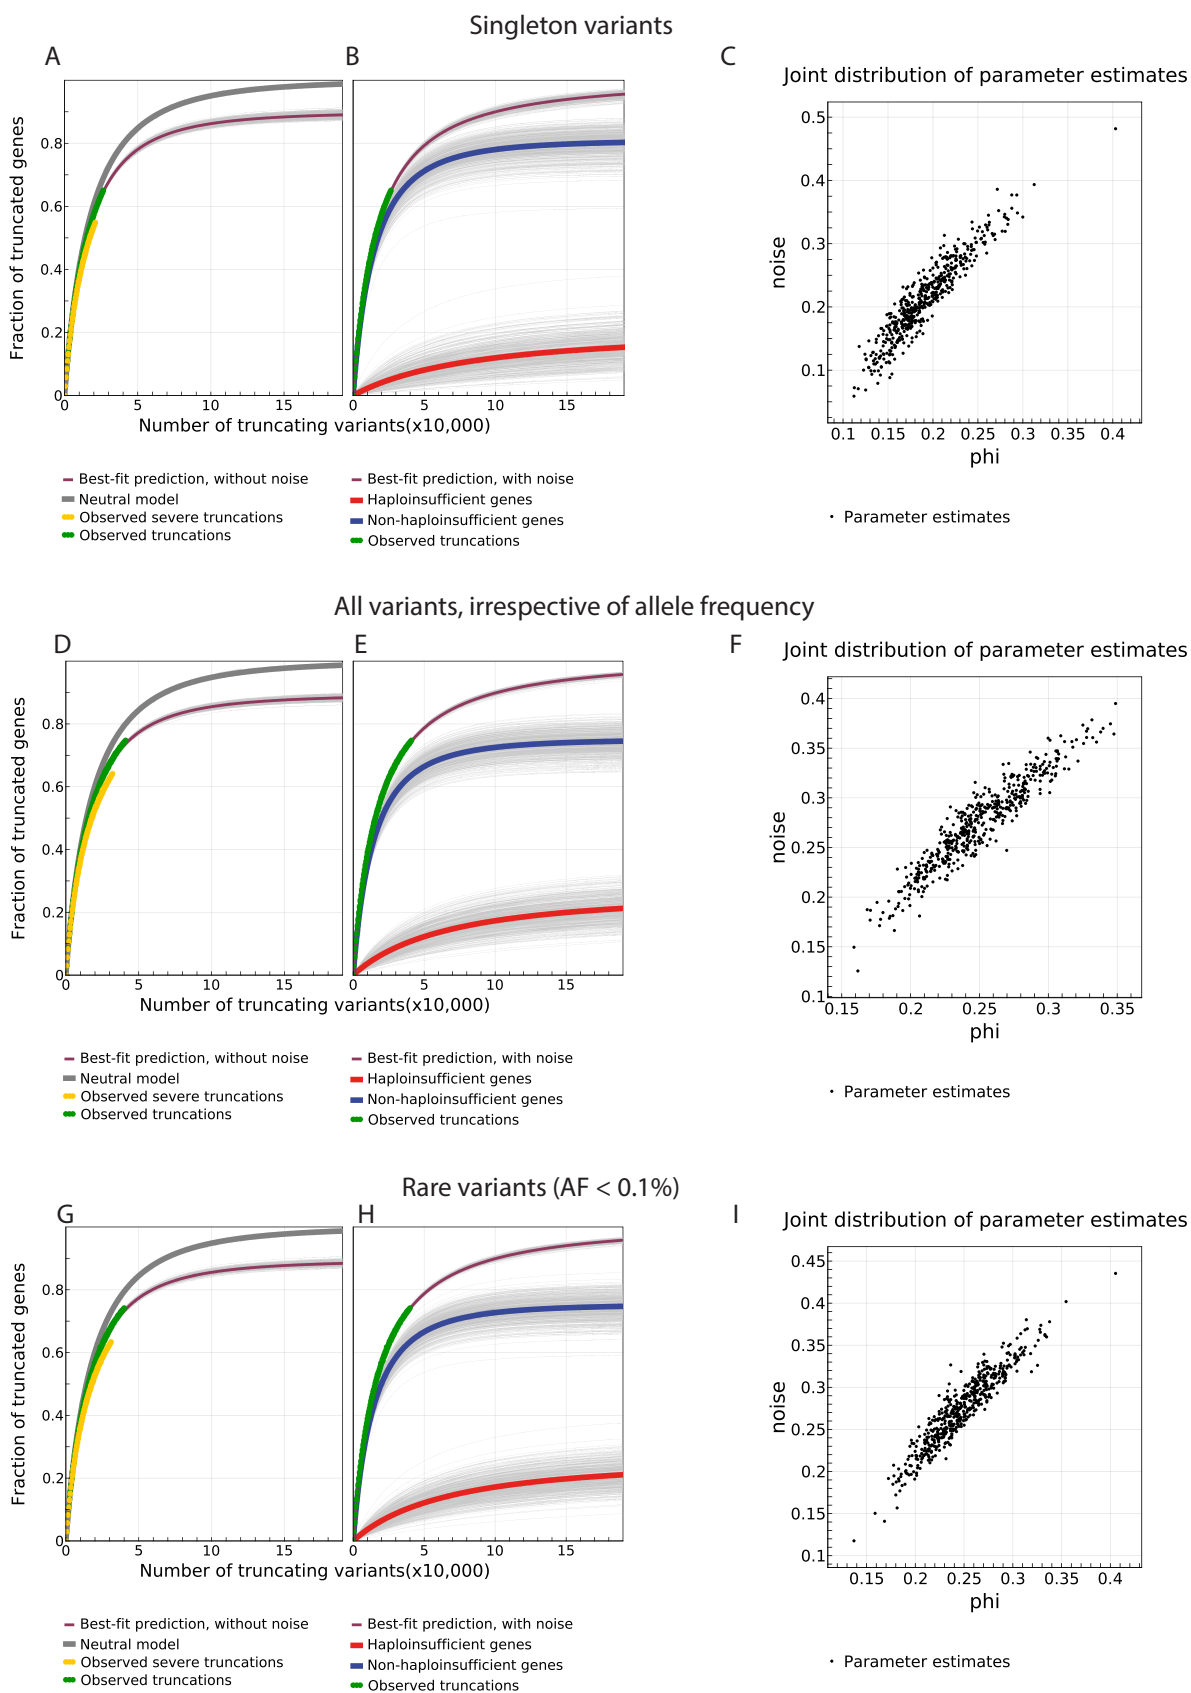

Figure S2. **Distribution of parameter estimates and predictions of the model A.** The analysis considers only singletons (A-C), all variants irrespective of allele frequency (D-F) or rare variants (G-I).

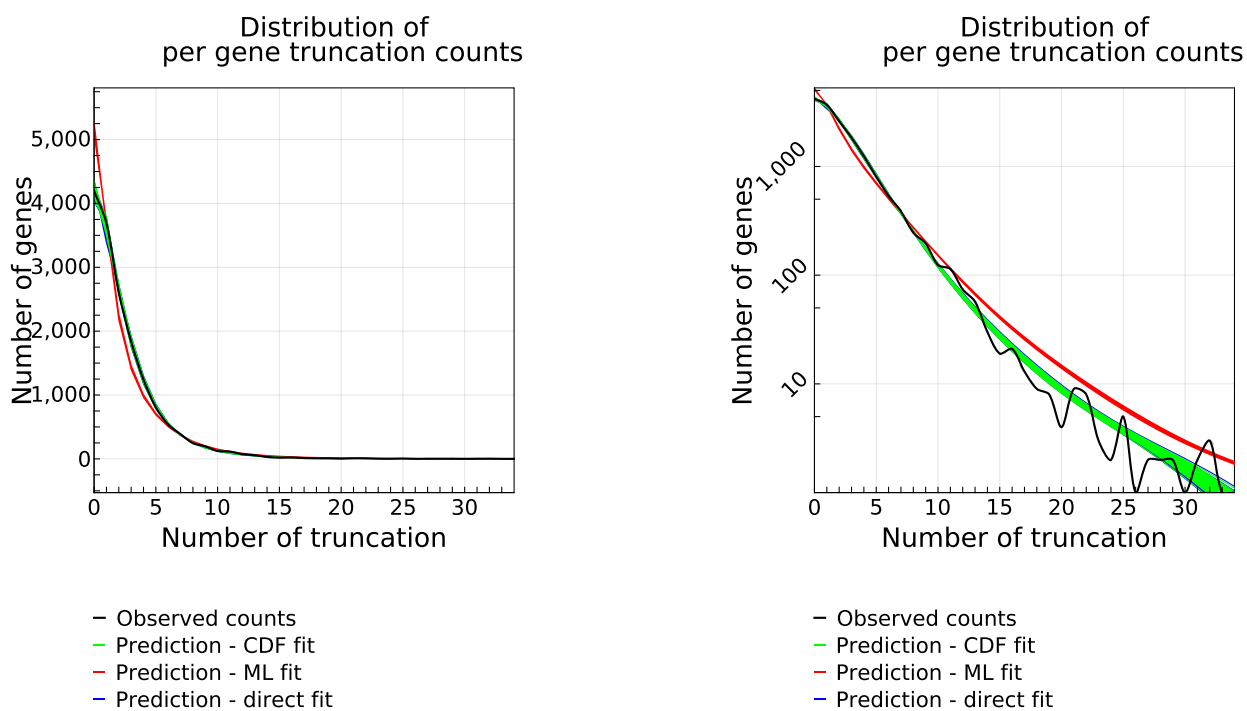

Figure S3: **Distribution of variant counts per gene as observed or predicted under best-fit parameters of model A using 3 different estimation techniques. A:** linear space, **B:** log space. Black curve: observed counts, red curve: prediction based on least-squares fit to the cumulative distribution function (see Online Methods), green curve: maximum likelihood estimate, blue curve: least squares fit to the accumulation curve of truncated genes as shown in Figure 1. The CDF method was chosen and maximum likelihood was discarded because its estimates did not fit the observations.

## References

- [34] Exome Variant Server, NHLBI GO Exome Sequencing Project.
- [35] A. Boyd, *et al.*, *International journal of epidemiology* **42**, 111 (2013).
- [36] G. R. Abecasis, *et al.*, *Nature* **491**, 56 (2012).
- [37] The Genome of the Netherlands Consortium, T. Genome, *Nature genetics* **46**, 818 (2014).
- [38] M. Firmann, *et al.*, *BMC cardiovascular disorders* **8**, 6 (2008).
- [39] J. Fellay, *et al.*, *PLoS genetics* **5**, e1000791 (2009).
- [40] NIEHS Environmental Genome Project, Seattle, WA.
- [41] S. Levy, *et al.*, *PLoS Biology* **5**, 2113 (2007).
